# Supplementary material for: Association between clinically probable REM sleep behavior disorder and tetanus in dogs
Source: PubMed Central journal article supplement — J Vet Intern Med. 2018 Oct 12;32(6):2029–36. doi: 10.1111/jvim.15320 (PMC6272037; doi:10.1111/jvim.15320), 2018-10-12
Supplement: JVIM-32-2029-s001.pdf [file JVIM-32-2029-s001.pdf]

61 dogs with a presumptive diagnosis of tetanus

50 dogs survived to discharge

11 dogs euthanized/  
died prior to discharge

5 dogs developed cpRBD  
prior to discharge  
(owner questionnaires returned for 2)

18 dogs developed cpRBD  
post-discharge  
(owner questionnaires returned for 18)

5 dogs did not develop cpRBD  
(based on medical records and owner  
questionnaires)

Post-discharge cpRBD status unknown in 22 dogs
